1 **Assessment of fetal corpus callosum biometry by**  
2 **3D super-resolution reconstructed T2-weighted MRI**

3 **Samuel Lamon<sup>1,2,3</sup>, Priscille de Dumast<sup>1,2</sup>, Vincent Dunet<sup>1</sup>, Léo Pomar<sup>3,4</sup>, Yvan Vial<sup>3</sup>, Mériam Koob<sup>1,†</sup>,**  
4 **Meritxell Bach Cuadra<sup>2,1,\*</sup>, †**

5 <sup>1</sup>Department of Radiology, Lausanne University Hospital and University of Lausanne, Lausanne, Switzerland

6 <sup>2</sup>CIBM Center for Biomedical Imaging, Lausanne, Switzerland

7 <sup>3</sup>Ultrasound and Fetal Medicine, Department Woman-Mother-Child, Lausanne University Hospital and  
8 Lausanne University, Lausanne, Switzerland

9 <sup>4</sup>School of Health Sciences (HESAV), University of Applied Sciences and Arts Western Switzerland, Lausanne,  
10 Switzerland

11 † Equally contributed

12 \* **Correspondence:** Meritxell Bach Cuadra

13 [meritxell.bachcuadra@unil.ch](mailto:meritxell.bachcuadra@unil.ch)

14 **Keywords:** super-resolution reconstruction, magnetic resonance imaging, ultrasound, biometry, fetal  
15 brain, corpus callosum, corpus callosum segments, agenesis of the corpus callosum

16 **Abstract**

17 **Objective:** To assess the accuracy of corpus callosum (CC) and its sub-segments' biometry by super-resolution  
18 (SR) 3-dimensional fetal brain MRI in comparison to measurements in 2-dimensional or 3-dimensional  
19 ultrasonography (US) and clinical low-resolution T2-weighted MRI sequences (T2WS).

20 **Method:** We performed fetal brain biometry of the overall length of the CC, the heights of its sub-segments  
21 and its area by two observers (one junior observer, obs1, and one senior pediatric neuroradiologist, obs2) in a  
22 cohort of 57 subjects (between 21 and 35 weeks of gestational age (GA), including 11 cases of partial agenesis  
23 of CC). Obs1 made measures on US, T2WS, and SR, and obs2 in T2WS and SR. Regression curves of CC biometry  
24 with GA were done. Statistical analysis of inter-modality (US vs. T2WS, US vs. SR, and T2WS vs SR) agreement  
25 for single observer (obs1) and inter-modality (US vs. T2WS, and US vs. SR) between observers (obs1 vs obs2)  
26 were also conducted.

27 **Results:** Our study shows a high concordance through GA of CC measurements performed by SR in comparison  
28 with US, with a higher agreement than biometry based on T2WS clinical acquisitions. For obs1, SR  
29 measurements are highly concordant to US (except for the genu and the CC length) and helps visualizing the  
30 splenium. For obs2, SR measurements are highly concordant to US, except for the rostrum and the CC length.  
31 Rostrum and Genu (forming the anterior callosum) are the subsegments with larger variability. Regression

32 curves by SR overlay more accurately those from the literature (by US) for the CC length, the splenium and the  
33 body than T2WS.

34 **Conclusion:** Super-resolution MRI could be used in the biometrical assessment of the CC, providing  
35 measurements close to US, except for the anterior part of the CC Thanks to its 3D-visualisation capacity and  
36 improved through plane spatial resolution, it allows to perform CC biometry more frequently than on T2WS.

## 37 1 INTRODUCTION

38 The corpus callosum (CC) is the largest brain commissure connecting homologous structures of both cerebral  
39 hemispheres and is fully formed after complex embryogenesis steps in-utero at 20 weeks of gestation (1). The  
40 corpus callosum is divided into four parts: the rostrum, the genu, the body and the splenium, from the most  
41 anterior to the most posterior part. Complete or partial agenesis of the corpus callosum (cCCA and pCCA,  
42 respectively) are among the most frequent brain malformations prenatally detected, with an estimated  
43 prevalence of 0.3 to 0.7% in the general population and of 2 to 3% in people suffering from  
44 neurodevelopmental disorders (2). The neurodevelopmental outcome in children born with a CC anomaly,  
45 now grouped over the term failed commissuration, is extremely heterogeneous, ranging from normal  
46 neurodevelopment to severe delay, depending not only on the specific type of CC anomaly, but also on the  
47 presence or absence of potentially associated cerebral and/or extra-cerebral malformations (3). Today, the  
48 main challenge does not lie in establishing the diagnosis, but in estimating the neurodevelopmental prognosis  
49 which remains very difficult to predict, as shown by post-natal follow-up studies (4). Therefore, the assessment  
50 of the integrity of the fetal CC, with an accurate biometrical and morphological analysis, is crucial for the  
51 evaluation of the pre- and post-natal management and the prognosis (5).

52 Ultrasound (US) and Magnetic Resonance Imaging (MRI) are complementary methods for evaluating fetal brain  
53 structural development. At the occasion of the routine 2<sup>nd</sup> trimester ultrasound examination, a screening for  
54 callosal abnormalities takes place. Direct evidence of a cCCA or pCCA, by absence of CC visualization,  
55 completely or partially, respectively, usually requires a mid-sagittal image. As this plane is not included in the  
56 required planes for the screening, we usually rely on indirect signs of CC absence on an axial image, such as  
57 the absence of the cavum of the septum pellucidum, that are more or less present according to the missing  
58 part (6). Anomalies of the CC also comprise the dysplasias, like the hypo- or hyperplasia where the CC is  
59 abnormally thin or thick, respectively. In case of a suspected callosal abnormality, an additional detailed US (a  
60 so-called neurosonogram, usually acquired transvaginally), is eventually performed by an expert and relies on  
61 the 3D imaging and sagittal, axial, and coronal views. Structural magnetic resonance T2-weighted sequences  
62 (T2WS) are recommended at 32 weeks of GA as a complement to the targeted US to either confirm and  
63 characterize or to rule out a suspected callosal abnormality and to look for other cerebral malformations (7,8).  
64 These two imaging modalities have their strengths and weaknesses and the study of the CC remains their  
65 biggest source of disagreement (3). Even if debated (9), mainly because of the lack of clarity regarding the way  
66 US exams were performed, a recent large prospective multicenter study, the MERIDIAN study, showed that,  
67 in failed commissuration, MRI was more accurate than US in detecting and characterizing CC anomalies, and  
68 this changed the prognosis and the clinical management in around 45% of the cases (3,10). Indeed, while US  
69 has better spatial resolution than MRI and benefits from 3D reconstruction techniques (11), it may be limited  
70 by the position of the fetus, mother habitus or oligohydramnios for example. However, without contesting the

71 benefit of MRI, some authors balanced the sonographer expertise over the contribution of MRI (6). Alike 3D-  
72 US, MRI allows a multiplanar acquisition. Its main strength is a good tissue contrast. However, clinical T2WS  
73 MRI acquisitions are still highly sensitive to motion and are limited by the acquisitions in thick slices (around 3  
74 mm through plane) as major drawback. Consequently, while a sagittal plane depicting the CC, the aqueduct of  
75 Sylvius and the pituitary gland is mandatory on fetal brain MRI, images are not always in the right anatomical  
76 plane, which may lead to important approximation errors in the fetal CC shape analysis and measurements  
77 (12). Postnatally, MRI remains the gold standard for pathological CC analysis, often supporting the  
78 reclassification of cCCA into pCCA (7) or showing additional brain abnormalities that may change the prognosis  
79 (1,6).

80 Super-resolution (SR) reconstruction of fetal brain MRI aims at overcoming the limitations of clinical low-  
81 resolution fetal MRI series, mainly motion artefacts and low spatial resolution. SR is a post-processing  
82 technique based on inter-slice motion correction and scattered data interpolation methods (13–19), where,  
83 by incorporating multiple orthogonal scans with thick slices, a volumetric motion free high-resolution image  
84 can be estimated. When SR succeeds, this allows to view perfect orthogonal planes in a 3D MR volume, with  
85 an isotropic resolution between 0.5 and 1.2 mm (3). The multiplanar reconstruction (MPR) in any plane is of  
86 particular interest in the accurate measurement of the CC and its potential abnormalities. However, like any  
87 other reconstruction method, SR may distort the real anatomy (3). Thus, previous works have explored the  
88 value of SR reconstruction to perform fetal brain biometry, for whole brain and posterior fossa (20–22) in  
89 comparison to clinical T2WS MRI, ocular biometry (23), as well as in normative fetal brain atlases (12,24). To  
90 our knowledge, apart from the length of the CC, detailed CC biometry has not yet been evaluated on SR  
91 reconstructed fetal brain MRI. Therefore, SR must be validated in comparison to the reference standard for  
92 fetal CC biometry used at the moment, i.e. US, before its use and dissemination in clinical practice. The primary  
93 purpose of this study is to assess whether SR is closer to US than T2WS in the measurement of the normal  
94 corpus callosum and its sub-segments. A secondary objective aims at exploring whether SR can assess pCCA.

## 95 **2 MATERIALS AND METHODS**

### 96 **2.1 Cohort**

97 We retrospectively utilized fetal brain MRI exams performed from 2014 to 2021 at our institution, the  
98 Lausanne University Hospital. All of them were conducted on medical indication. From this database, we  
99 selected 62 MRI exams with at least 3 orthogonal T2WS series: 50 were considered normal (either no anomaly  
100 was detected, or they presented a mild ventriculomegaly, i.e., <12mm) and 12 presented pCCA (defined by  
101 absence in whole or in part of one or more sub-segments of CC and is recognized by a short or abnormal shape  
102 of CC).

103 In the normal patients' cohort, three exams were discarded because of a twin pregnancy (creating a too  
104 important risk of confusion between the fetuses) and one due to an opposition to the general consent form.  
105 In the pCCA patients' cohort, one exam was discarded because of a twin pregnancy (see Figure 1).  
106 Consequently, a total of 57 T2WS exams were included in this study, where 46 were considered normal (38  
107 without anomaly and 8 with mild ventriculomegaly) and 11 presented pCCA. Gestational age (GA) ranged from  
108 21 to 35 weeks in the normal group and from 22 to 31 weeks in the pCCA group. GA determination was based

109 on the last menstrual period and confirmed by at least one US examination during the first trimester of  
 110 pregnancy. All images were anonymized prior to further analysis. This retrospective study was part of a larger  
 111 research protocol at our institution approved by the local ethics committee (CER-VD 2021-00124).

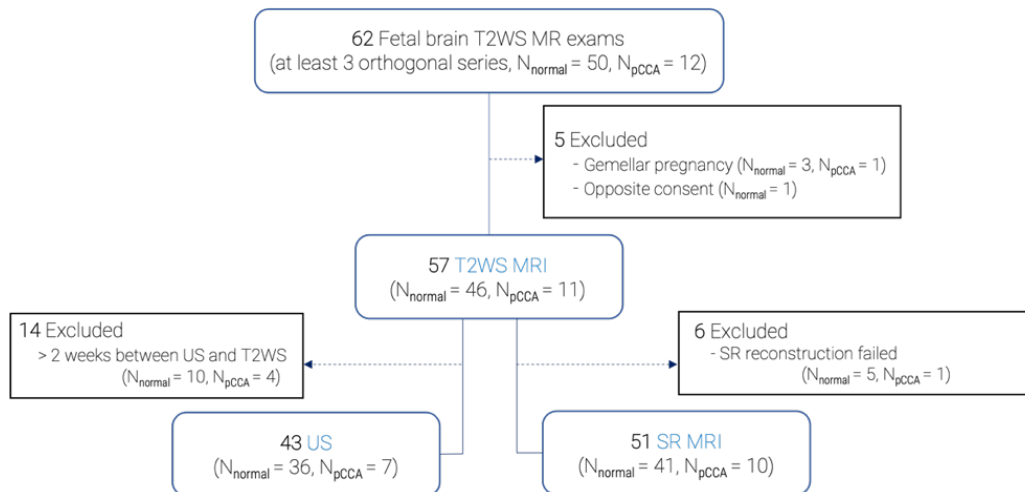

112

113

**Figure 1** Data selection flow chart.

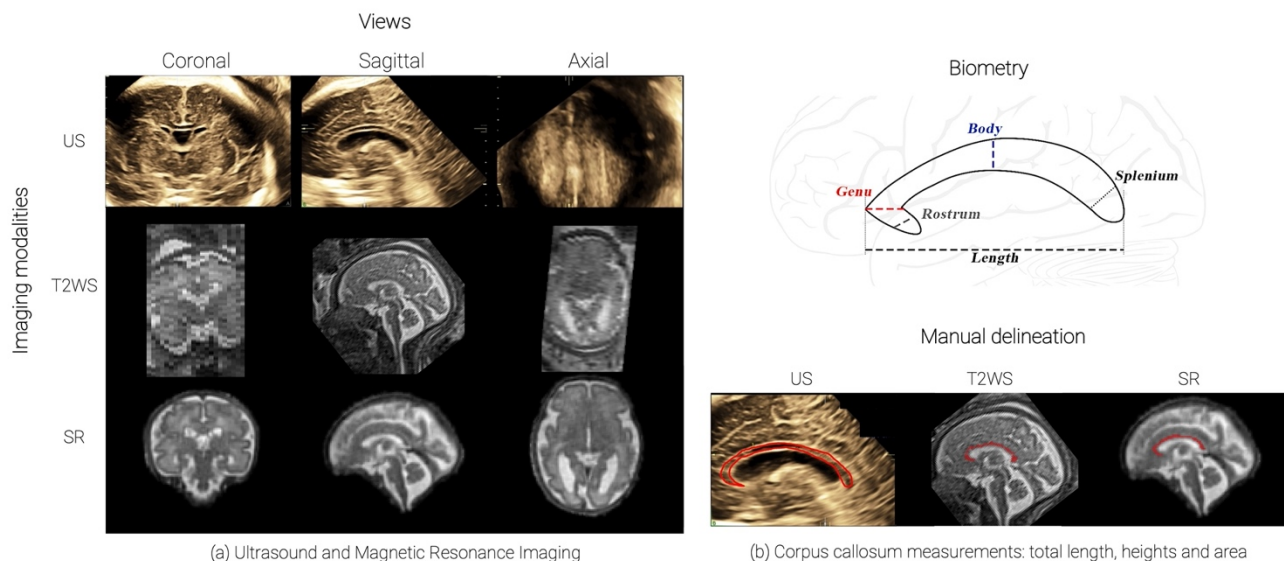

114

115 **Figure 2** Imaging of the Corpus Callosum (CC): (a) Examples of the different imaging methods: a 3D ultrasound  
 116 (top row), one T2WS MRI with thick slice series acquired in sagittal orientation (middle row, sagittal view has  
 117 been manually reoriented for better visualization, additional low-resolution T2WS in other orientations,  
 118 coronal and axial, are also acquired), 3D super-resolution (SR) reconstruction MRI (bottom row); (b) Biometry

119 of the CC and its sub-segments (from anterior to posterior : rostrum, genu, body, and splenium) and manual  
120 delineation of CC area (bottom).

## 121 **2.2 Magnetic Resonance Imaging**

### 122 **2.2.1 Clinical acquisitions**

123 Clinical MR images were acquired either at 1.5 T (MAGNETOM Aera, Siemens Healthcare, Erlangen, Germany)  
124 (91% of the exams) or at 3 T (MAGNETOM Skyrafit, Siemens Healthcare, Erlangen, Germany) (9% of the exams).  
125 The fetal brain MRI protocol included T2-weighted Half-Fourier Acquisition Single-shot Turbo spin Echo  
126 (HASTE) sequence in the three orthogonal orientations. On average, for each subject, 7 T2WS series (also  
127 denoted as stacks) were available (range of 3 to 20) and the best stack was visually selected according to its  
128 quality. Figure 2a (middle row) shows an example of one T2WS HASTE sagittal acquisition (good in-plane  
129 sagittal resolution but thick slices visible in coronal and axial views), where the sagittal view has been rotated  
130 for better visualization.

### 131 **2.2.2 Super-resolution reconstruction**

132 The super-resolution reconstruction pipeline consists, in order, in the selection of low-resolution T2WS stacks,  
133 brain extraction, bias field correction, inter-slice motion estimation based on slice-to-volume rigid registration,  
134 and SR reconstruction. We used the MIALSRTK pipeline (14) which is based on an inverse problem formulation  
135 that is solved via an efficient total variation regularization. The selection of the series used for the SR  
136 reconstruction was done based on visual inspection, and T2WS stacks that exhibited extreme level of motion  
137 and/or intensity signal dropouts (thus, that were not exploitable for radiological reading neither) were  
138 excluded. The automated brain extraction was manually corrected if needed. In our study, on average 5.6  
139 T2WS stacks per subject's reconstruction were used (range of 3 to 9). All SR images were reconstructed with  
140 an *isotropic spatial resolution* matching its input in-plane resolution (in average of around  $1.1 \text{ mm}^3$  for 1.5T  
141 and  $0.5 \text{ mm}^3$  for 3T exams). Figure 2a (bottom row) shows an example of SR image. Six MR exams failed to be  
142 reconstructed due to either bad T2WS quality or strong motion remaining. A total of **51 SR exams** (41 normal  
143 and 10 pCCA) were finally available for measurements.

## 144 **2.3 Ultrasound imaging**

145 We selected US images within a time frame of two weeks before or after MR imaging, as recently suggested in  
146 the MERIDIAN cohort (25) and in many other studies (6,26,27). The precise time difference between imaging  
147 methods is illustrated in Supplementary Material (Figure S1). We believe that it is a good compromise to  
148 maintain a good framework for comparing biometric measurements while avoiding excluding too many  
149 patients. This led to 43 US sessions (36 normal and 7 pACC) available for performing measurements (Figure 2a,  
150 top row). The US images were acquired on General Electric (ZEPHYRUS, Austria) Voluson 730, E8, E10 devices,  
151 equipped with 5- to 8-MHz 3D transabdominal and transvaginal transducers. They have been acquired by  
152 members of the ultrasound and fetal medicine unit of our institution, either experimented obstetricians or  
153 midwives specialized in fetal neurosonography. Of all the US series used, 92.9% of them were 3D-US (39 out  
154 of 43) and only 3 out of 43 subjects (7.14%) were 2D-US. In the case of 3D-US, the acquisitions of the brain  
155 volumes containing the CC are performed after optimization of the 2D image starting from a bi-parietal

156 diameter or a trans-cerebellar axial plane using a multiplanar mode with the best resolution available. The 3D  
157 volume is then displayed as multiple orthogonal 2D images, that are isotropic (28). In the case of 2D-US, they  
158 are acquired on a mid-sagittal plane starting from the same trans-cerebellar axial view, by aligning the  
159 transducer along the anterior fontanelle and the sagittal suture which serve as an acoustic window (29).  
160 Volume contrast imaging (VCI) is a tool that provides a thin 3D slice of the studied view. It helps reducing  
161 artifacts and increasing image resolution and contrast (28). In our study, this mode was used from 1 mm at 18  
162 weeks up to 4 mm at 38 weeks.

## 163 **2.4 Measurements**

### 164 **2.4.1. CC biometry and manual delineation**

165 Two observers, one junior observer (obs1) without specific experience in fetal brain MRI and one senior  
166 pediatric neuroradiologist (obs2), with 15 years of experience of fetal brain MRI, independently measured the  
167 overall length of the CC and heights of its sub-segments on both MRI datasets (T2WS and SR). Both were  
168 blinded for clinical data, including GA. Obs1 also performed the same measurements on US images, supervised  
169 by a midwife with 10 years of experience in fetal brain sonography and a skilled obstetrician with 35 years of  
170 experience, who both reviewed US measures at multiples time and validated them. Thus, US measurements  
171 will be used as *standard for reference* expert biometry.

172 On MR imaging (T2WS and SR), the free-resource ITK-SNAP software, version 3.6.0 (30) was used, and the  
173 images were then re-oriented to fit in the orthogonal axis. For T2WS, the best low-resolution stack for each  
174 orthogonal plane was chosen after a visual examination. On US, measurements were directly performed on  
175 the US devices, which allowed to re-navigate in all planes to find the best mid-sagittal one available. All CC  
176 measurements were related to the length and height of the hypoechoic area, excluding the boundary  
177 hyperechoic structures. They were performed with a 0.1 mm resolution cross-shaped caliper.

178 The following CC measurements (Figure 2b, top) were done on each imaging (US, T2WS, and SR): the outer-  
179 outer CC length (**LCC**), and the **heights of** the rostrum (**Rostrum**), genu (**Genu**), body (**Body**), and splenium  
180 (**Splenium**), according to the standard techniques described in the literature (31):

- 181 • *Rostrum* is the most anterior part which is oriented postero-inferiorly,
- 182 • *Genu* is defined as the segment situated anteriorly to a line passing through the anterior fornix and parallel  
183 to another line passing through the posterior fornix and the quadrigeminal plate,
- 184 • *Body* is situated between the splenium and the genu, and
- 185 • *Splenium* corresponds to the posterior 20% of the CC.

186 The measurements of pCCA followed the same methodology as for normal cases (examples of pCCA are  
187 illustrated in Figure 3).

188 The CC measurements were performed on the best midsagittal images available. First, all measurements were  
189 performed on T2WS as a block. Then, they were performed on US only, and afterwards on SR. For each imaging  
190 type, measurements lasted for approximately one week. CC measurements were always made three times in  
191 a row by each observer and were then averaged to minimize the intra-measurement variability. Remotely, we



192 repeated the measurements on a subset of 10% of the exams (9 normal and 3 pCCA) serving as a reproducibility  
193 study.

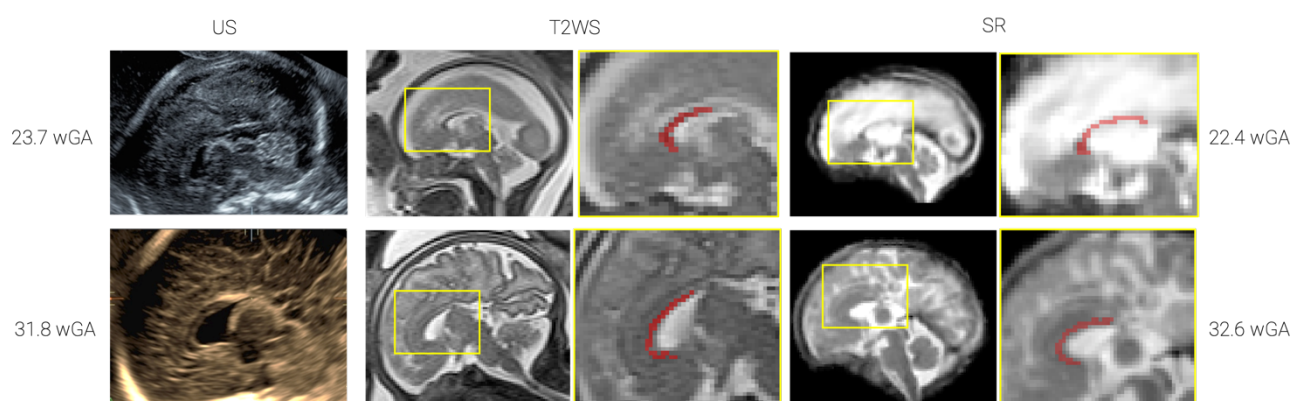

194  
195 **Figure 3** Examples of pCCA with the three imaging methods: patient (top row) is around 23 weeks of  
196 GA (23.7 wGA at time of US, and 22.4 wGA at time of MRI); patient (bottom row) is around 32  
197 weeks of GA (31.8 wGA at time of US and 32.6 wGA at time of MRI).

198 Finally, manual delineation of the CC on T2WS and SR was done with the Paintbrush mode in ITK-SNAP open-  
199 source software (30). The CC area was approximated by the addition of all those voxels times its voxel size. On  
200 US, we manually drew the outer contour of the CC using the US device, which automatically gave a measure  
201 of the CC area (Figure 2b, bottom).

#### 202 **2.4.2. Image Quality evaluation**

203 For all modalities, image quality scores were estimated by obs1. T2WS quality criteria consisted of the mean  
204 of 6 items, three of them on the CC (quality of the visualization of the CC, visualization of a whole CC, amount  
205 of blurring of the CC), and three on the global stack quality (obliquity of the plane, global stack motion, global  
206 stack blurring). Each item could be rated from 0 to 3 (0=unusable, 1=bad, 2=average, 3=good). Similarly, for SR  
207 reconstruction, a quality assessment was done using the same criteria than the ones used for T2WS, though  
208 without the obliquity of the plane and the global stack motion, which are irrelevant with SR.

209  
210 The quality of US images was scored using the quality score proposed by Pomar et al. (29) in their sonographic  
211 study of the CC. It consists of the sum of 5 criteria: strict sagittal plane with clear visibility of the cerebellar  
212 vermis, the brain stem, the fourth ventricle and the CC, the visualization of the 4 parts of the CC, a sufficient  
213 zoom, a clear differentiation of CC from the cavum septum pellucidum, and a right placement of the calipers.  
214 These criteria were rate as either 1=yes or 0=no. 5 points were equivalent to a good quality, 3 to 4 points to  
215 an average quality, 1 to 2 to a bad quality and 0 to an unusable exam.

### 216 **2.5 Regression and statistical analysis**

217 **2.5.1. Regression with gestational age.** Regression analysis was done using measurements of normal subjects  
218 only (including mild ventriculomegaly and excluding pCCA). We compared our normative regression with  
219 previously validated published charts (31,32) serving as first assessment. Specifically, US measurements are

220 compared to Pashaj et al. (31) for all CC biometric measurements. T2WS CC length is compared to Tilea et al.  
221 (32). To our knowledge, neither MR T2WS nor SR measures of CC sub-segments exist. CC area are compared  
222 to previously reported area from US imaging (33).

223 **2.5.2. Statistical analysis.** We evaluate the discrepancies between the subsets of the measurements  
224 performed:

- 225 • We assess the discrepancies between the imaging setting (US, T2WS, and SR) measurements of obs1  
226 (inter-modality agreement for a single observer).
- 227 • To remove the confounding of the experience, we assess the inter-modality agreement (US vs. T2WS,  
228 and US vs. SR), between observers, in which US measurements are those performed by obs1 that are  
229 validated by two US experts, and MR measurements (T2WS and SR) are from the MR experienced  
230 obs2.

231  
232 For each of these comparisons, a paired Wilcoxon rank sum test was performed, with statistical significance  
233 set to  $p < 0.05$ . P-values are adjusted for multiple comparisons (five: **LCC**, **Rostrum**, **Genu**, **Body** and **Splenium**)  
234 using Bonferroni correction.

### 235 **3 RESULTS**

#### 236 **3.1 Analysis of different imaging datasets**

237 Figure 4 summarizes the quality evaluation (range of blues) and the missing values (red) in the different  
238 evaluated imaging methods. Overall, missing values were more often occurring in US than in T2WS and SR. Out  
239 of 43 US exams, measurements were not possible in 14 cases (32.5%). In one half of them we observed a bad  
240 US image quality, in the other half an acceptable image quality and none of them occurred on an excellent  
241 quality exam. In T2WS, out of 57 exams, measurements were not possible 11 times (19.3%). Measurements  
242 were mostly missed for the rostrum's height (10 cases out of 57, 17.5%), including 8/10 (80%) acceptable  
243 quality exams and 2/10 (20%) excellent quality exams. Finally in SR, only 2 cases out of 51 (3.92%) had missing  
244 measurements and they both involve the rostrum's height (one on a bad quality exam and the other one on  
245 an acceptable quality exam). The higher overall quality of T2WS MRI over US is probably explained, at least  
246 partially, by the fact that subjects were initially selected on the basis of the MR exam.



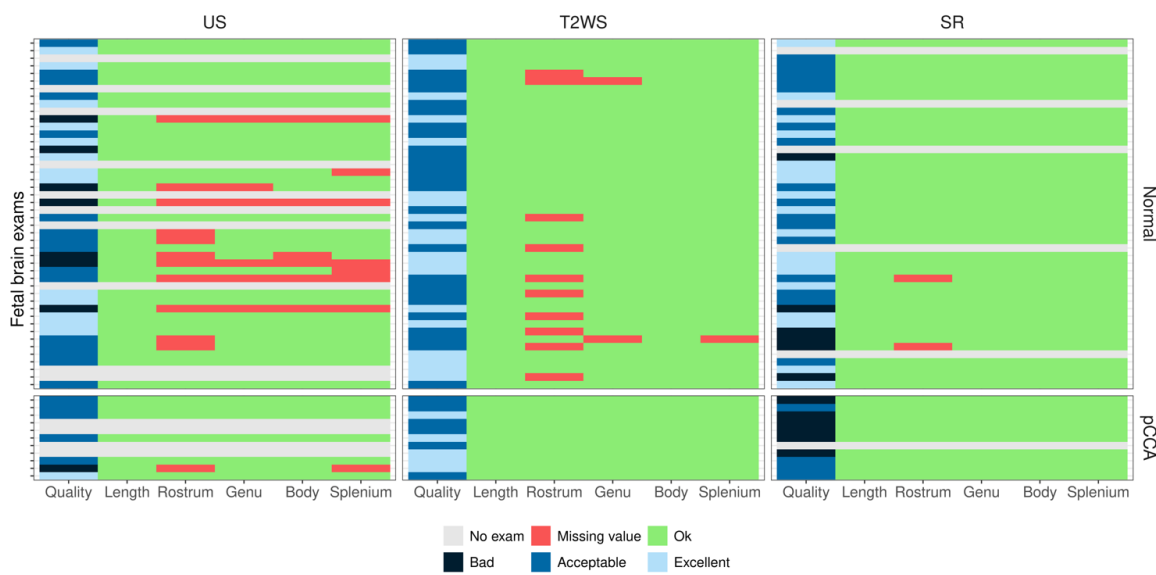

247

248

**Figure 4** Imaging quality and availability of measurements.

249

**Table 1** Percentage of measurements done per CC biometry

| %              | LCC | Rostrum | Genu | Body | Splenium |
|----------------|-----|---------|------|------|----------|
| <b>US</b>      | 100 | 72      | 86   | 86   | 81       |
| <b>MR T2WS</b> | 100 | 82      | 96   | 100  | 98       |
| <b>MR SR</b>   | 100 | 96      | 100  | 100  | 100      |

250

### 251 **3.2 Corpus callosum length and heights**

252 Figure 5 shows the results of **LCC** measurements of intra-observer (obs1) on the three imaging techniques, US,  
 253 T2WS and SR. Let us recall that pathological subjects with partial CCA are shown (illustrated by triangles) but  
 254 not used for the regression curves. US and T2WS measurements are respectively compared with reported  
 255 value in the literature from US (31) and T2WS MRI (32) (gray solid and dashed lines). In both cases, **LCC** shows  
 256 a high agreement with previous works. The fourth panel in Figure 5 illustrates that the regression of the SR  
 257 (yellow) overlaid on the regression of our measurements for US and T2WS. In fact, the SR measurements  
 258 better fit the US (red) than T2WS (blue). The repeatability study on 12 subjects shows overall a high intra-class  
 259 correlation coefficient of observer 1 (overall >0.99) in all three imaging settings (see Supplementary Material,  
 260 Table S1).

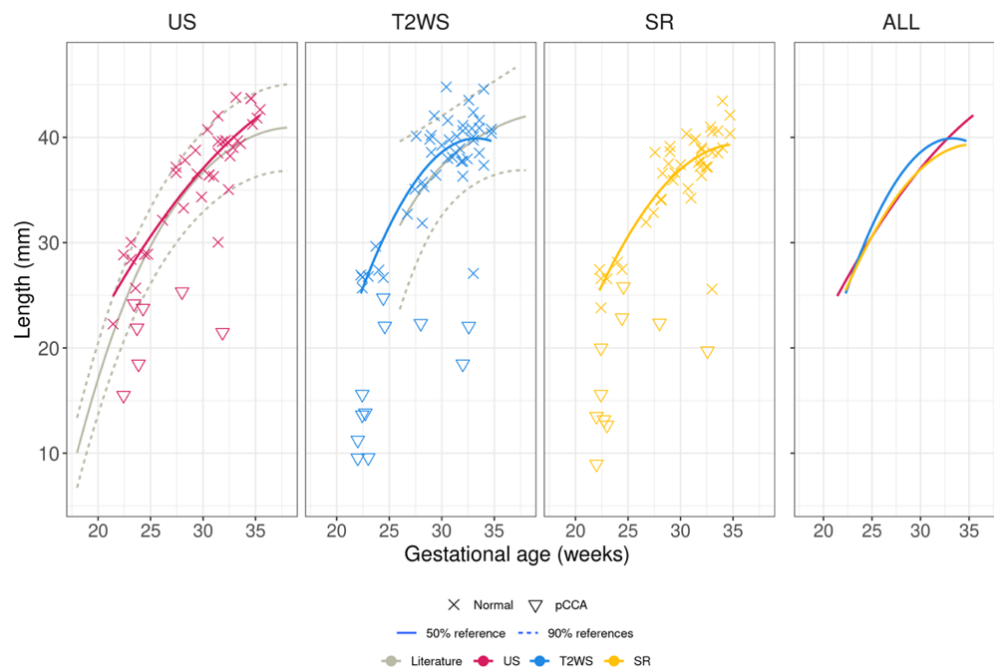

261

262 **Figure 5** Length of the corpus callosum by obs1. US and T2WS measurements are respectively compared with  
263 previous reported value in the literature (gray solid and dashed lines) from US (31) and T2WS MRI (32).  
264 Pathological subjects with partial CCA are shown (illustrated by triangles) but not used for the regression  
265 curves.

266

267 **Figure 6** shows the comparison of CC sub-segments' heights measurements done by obs1 on the three imaging  
268 setting US, T2WS and SR per each sub-segment. We also illustrate previous values reported in the literature  
269 based on the US only (31) as no reported sub-segment values based on MR T2WS nor SR exist to our  
270 knowledge. Overall, for all imaging US, T2WS and SR, the agreement with previous values reported in literature  
271 is high for **Body** and **Splenium**, while it deviates more for **Rostrum** (US) and **Genu** (all imaging).

272 Intra-rater (obs1) statistical analysis of **LCC** and CC sub-segments' heights measurements are reported in Table  
273 2. Biometry differences between T2WS and SR were statistically significant for **LCC**, **Genu** and **Rostrum**.  
274 Between T2WS and US, statistically significant differences were found for the **Genu** and **Splenium**. Finally, SR  
275 and US differences appear in **LCC** and **Genu**.

276

277

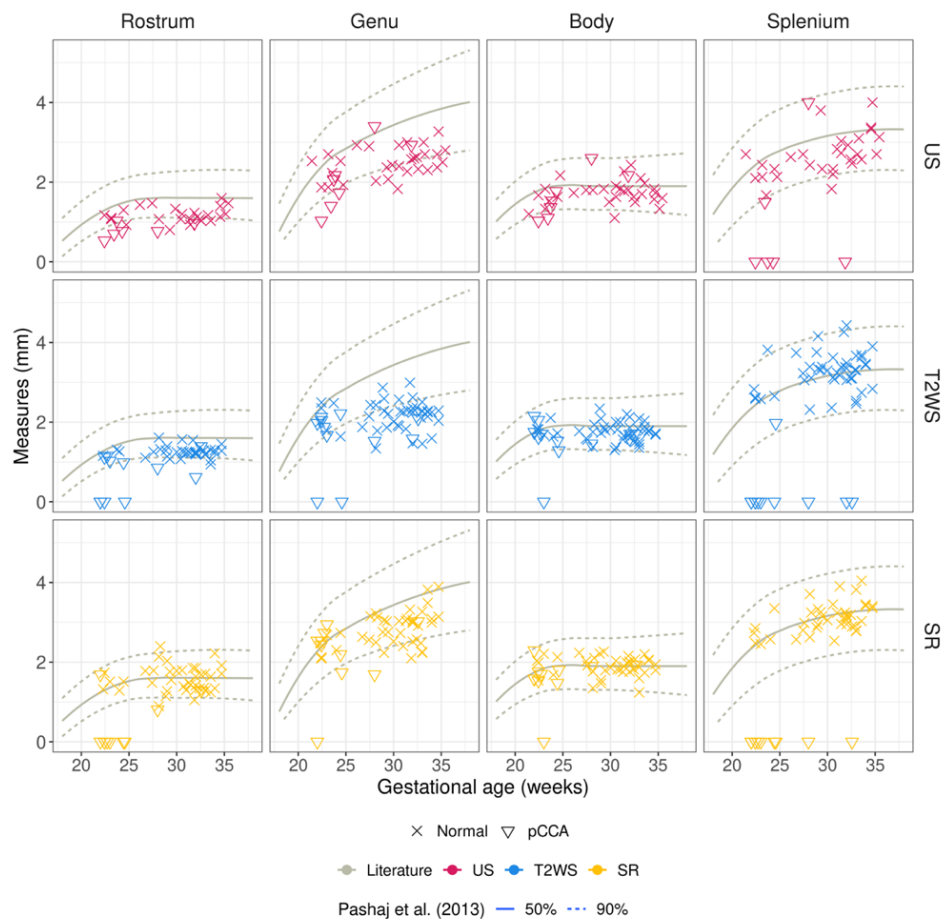

278

279

280

281

**Figure 6** Analysis of CC heights in our cohort for US, T2WS and SR by obs1. Previous reported values in the literature (solid and dashed lines) are from US measurements reported in (31). Pathological subjects with partial CCA are shown (illustrated by triangles) but not used for the regression curves.

282

283

**Table 2** Intra-observer (obs1) variability between the different imaging measurements of the CC length and the heights of its sub-segments.

| <b>p-value</b><br>(sample size) | <b>LCC</b>                | <b>Rostrum</b>            | <b>Genu</b>               | <b>Body</b>               | <b>Splenium</b>            |
|---------------------------------|---------------------------|---------------------------|---------------------------|---------------------------|----------------------------|
| <b>US vs. T2WS</b>              | 1.0<br>(N=43)             | 1.0<br>(N=24)             | <b>5.5e-03*</b><br>(N=35) | 1.0<br>(N=37)             | <b>6.7e-03 *</b><br>(N=34) |
| <b>T2WS vs. SR</b>              | 0.25<br>(N=51)            | <b>2.7e-02*</b><br>(N=42) | <b>1.1e-07*</b><br>(N=49) | <b>2.7e-02*</b><br>(N=51) | 0.41<br>(N=50)             |
| <b>US vs. SR</b>                | <b>1.4e-02*</b><br>(N=38) | 0.32<br>(N=26)            | <b>1.7e-02*</b><br>(N=32) | 0.09<br>(N=32)            | 0.14<br>(N=30)             |

284

285

286

287

### 288 3.4 Expert US versus expert MRI

289 We first analyzed inter-modality performance minimizing the effect of the experience. Figure 7 shows the  
 290 Bland-Altman plots of MR measures (expert is obs2) as compared to expert US (expert is obs1): negative  
 291 differences mean MR measures overestimated US ones; average/median differences (solid lines) are around  
 292 0, but Rostrum is close to  $-1\text{mm}$ ; few outliers (beyond dashed lines) are present. Additionally, regression of CC  
 293 measurements with GA as compared with literature are shown in Supplementary Material (Figures S2 and S3).  
 294 We explored whether there were statistically significantly different measurements between expert observers  
 295 (Table 3). Results indicate that **Rostrum** has significantly different measurements between US and MR, both  
 296 for T2WS and SR imaging, and **LCC** for US and SR only. Finally, we assessed the inter-observer (obs1 and obs2,  
 297 junior and expert respectively) biometric measurements within MR SR imaging. They showed statistical  
 298 differences ( $p < 0.05$ ) for the heights of the **Genu** and the **Rostrum** (Table 4).

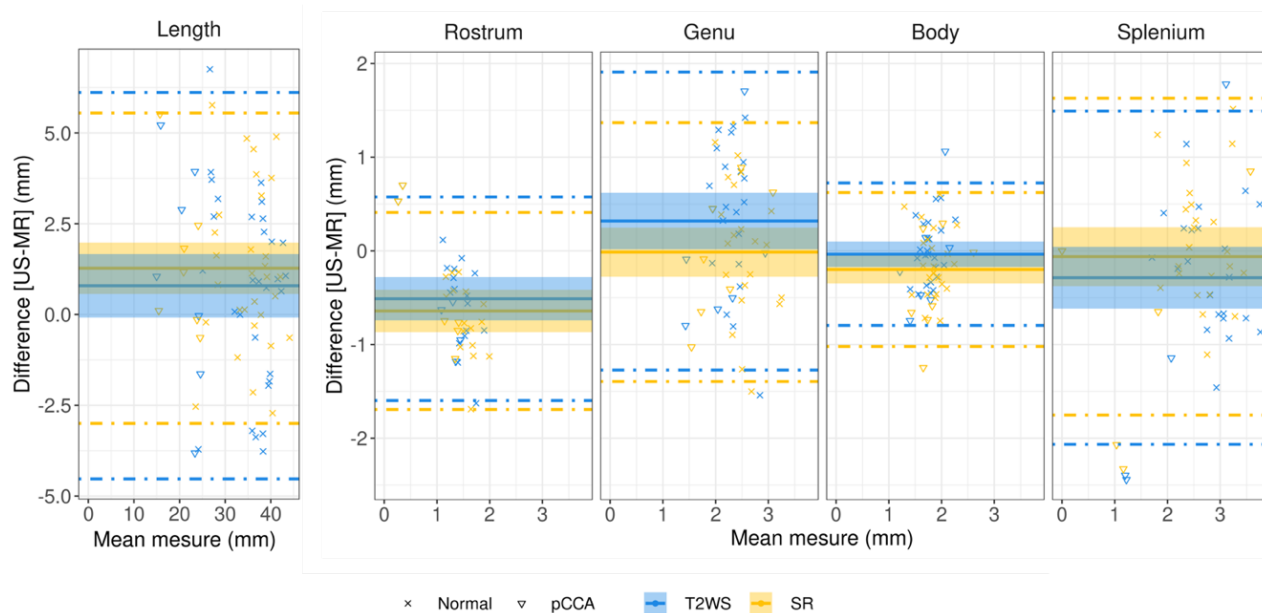

299 **Figure 7** Bland-Altman plots for LCC and CC heights assessing expert US vs expert MRI measurements (T2WS  
 300 in blue, SR in yellow) for all normal (cross symbol) and pathological subjects (triangle symbol) with partial CCA.  
 301 The plot's x-axis shows the average measurement, while the y-axis shows the difference in measurements  
 302 between them. The average difference in measurements is represented by the solid line, while the 95 percent  
 303 confidence interval limits are represented by the dashed lines. Dashed lines = 95% limits of agreement, and  
 304 shadow areas correspond to the 95% confidence interval (CI).  
 305

306

307 **Table 3** Statistical analysis inter-modality by experts US (Obs1) and MR (Obs2).

| p-value<br>(Sample size) | LCC            | Rostrum                   | Genu              | Body          | Splenium       |
|--------------------------|----------------|---------------------------|-------------------|---------------|----------------|
| <b>US vs. T2WS</b>       | 0.42<br>(N=42) | <b>1.6e-04*</b><br>(N=28) | 7.7e-02<br>(N=34) | 1.0<br>(N=35) | 0.19<br>(N=34) |

|                  |                           |                           |               |                   |               |
|------------------|---------------------------|---------------------------|---------------|-------------------|---------------|
| <b>US vs. SR</b> | <b>8.2e-03*</b><br>(N=38) | <b>9.1e-05*</b><br>(N=25) | 1.0<br>(N=31) | 6.6e-02<br>(N=32) | 1.0<br>(N=30) |
|------------------|---------------------------|---------------------------|---------------|-------------------|---------------|

308

309

**Table 4** Statistical analysis inter-observers within SR measurements.

| <b>p-value</b><br>(Sample size) | <b>LCC</b>    | <b>Rostrum</b>          | <b>Genu</b>               | <b>Body</b>       | <b>Splenium</b>   |
|---------------------------------|---------------|-------------------------|---------------------------|-------------------|-------------------|
| <b>SR</b>                       | 1.0<br>(N=51) | <b>9e-05*</b><br>(N=48) | <b>1.1e-02*</b><br>(N=50) | 8.3e-02<br>(N=51) | 8.6e-02<br>(N=51) |

310

311

### 312 3.5 Area of the corpus callosum

313 Figure 8 shows our results of estimated CC area per GA. Previously reported results in the literature (33) from  
 314 US are also illustrated (depicted in gray). Our results on US are in line with literature for young fetuses (<27  
 315 weeks of GA) but deviate more at later gestational stages (red). Interestingly, SR (yellow) mimics the same  
 316 trend through GA than US, but slightly overestimates the area (same slope through GA). This might be due to  
 317 higher partial volume effects and coarse spatial resolution in MR as compared to US. Different trend is depicted  
 318 by area on T2WS (blue).

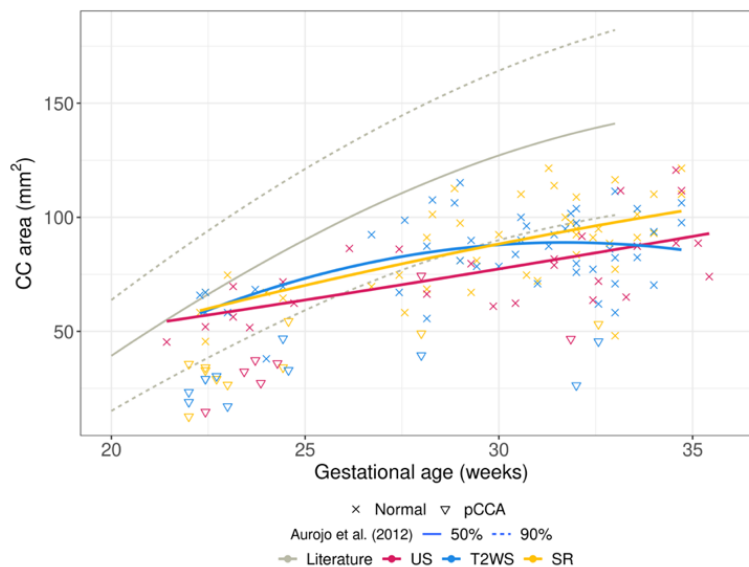

319

320 **Figure 8** Area of CC: manual delineation on US, T2WS and SR. Pathological subjects with partial CCA  
 321 are shown (illustrated by triangles) but not used for the regression curves.

## 322 4 DISCUSSION

### 323 4.1 The length of the CC can be accurately measured by both MR imaging methods

324 Several biometric charts of the fetal brain growth by US, including linear regressions of **LCC**, have been  
325 published (29,31,34,35). Also, morphometry of the fetal brain by T2WS MRI has been previously explored  
326 (32,36,37). Besides, assessment of **LCC** measurements on SR in comparison to T2WS was presented in a recent  
327 study from our institution (22). Our first contribution is the study of **LCC** across gestational age (GA) on T2WS  
328 and SR on a larger cohort (around 50 subjects) and in comparison with expert US measurements, which  
329 consolidates the reliability of the previous works cited just above. Indeed, the **LCC** regression from SR  
330 measurements precisely overlays the US ones (both from our own cohort and from (31)) and slightly better  
331 than T2WS does, testifying of its proximity with the gold standard. Statistical paired-wise analysis of **LCC**  
332 measurements between US and SR (intra-observer 1 and inter-experts) is though significantly different. Given  
333 though the excellent fit to US in the regression with GA, we hypothesize that this is due to the acquisition time  
334 difference between US and MRI, as evoked by the steep slope of the **LCC** growth.

#### 335 **4.2 Novel normative measurements of different CC segments heights across GA on MRI**

336 Until today, fetal CC height measurements were only performed by mean of US imaging, as MRI spatial  
337 resolution was considered too low to provide trustable measures of such small structures (38,39). As such, no  
338 normative values for the different CC heights existed for fetal brain MRI, neither on clinical low-resolution  
339 series nor on super-resolution reconstructions. In our study, for the first time, we elaborated linear regressions  
340 and analyzed the reliability of MRI (T2WS and SR) in the measurement of the heights of the CC sub-segments.  
341 The CC heights on SR (and to a less extent T2WS) match well the US ones. All CC heights in both US and MR  
342 imaging settings fit well with the US ones reported previously in the literature (31), though to a lower extent  
343 the **Genu**. Both observers in our study reported that SR helped for the assessment of the splenium, which is  
344 the most posterior part of the CC. We hypothesize that SR images of the fetal brain improve the visualization  
345 of the CC by dint of the enhanced through-plane spatial resolution that it offers and thanks to the opportunity  
346 to freely navigate in the 3 orthogonal views. This multiplanar approach diminishes the risk of confusion with  
347 other nearby anatomical structures of the CC whose MR image intensities are very close, such as the  
348 periventricular germ layer, the pericallosal and cingular sulci and the Galen's and internal cerebral veins. This  
349 risk of error is in fact more pronounced if the images are oblique, a situation that may often occur when  
350 evaluating T2WS.

351 Currently, it is widely accepted that the quality of the MR imaging of the CC decreases in a postero-anterior  
352 fashion. Indeed, the more liquid the environment surrounding the CC is, as it is found in the posterior CC, the  
353 more contrast is created within the brain tissues, which ultimately allows for a better discrimination of the CC  
354 structure. As MR imaging mainly depends on the water content, while US imaging mainly depends on the  
355 impedance of the structures, this might explain why US is considered superior to MRI in the imaging of the  
356 anterior corpus callosum. Considering this, we postulated that SR MRI could help better visualize the whole  
357 CC. Our results show that the genu remains more difficult to see on MRI (both on T2WS and SR) compared to  
358 US. The lack of superiority of SR may be partially explained by the variable size of the broad genu according to  
359 the location of measurement, even if performed at the right designated anatomical location. Furthermore, as  
360 demonstrated by Pashaj et al (31), it is the segment whose biometry depends the most on the gestational age  
361 and, as such, can be the more sensitive CC sub-segment to the timeframe between the US et MRI acquisitions.

#### 362 **4.3 Less missing CC sub-segments measurements in SR MRI**



363 In some cases, fetal brain MRI biometry may be useful in addition to the measures done in US, such as after  
364 an incomplete US examination due to an inconvenient maternal condition or an unfavorable position of the  
365 fetus (40). In our study, the rate of non-visualization of CC segments was lower on SR than on US and T2WS.  
366 Indeed, in SR, missing values were observed only in 2% of the exams versus 28.6% in US and 18.2% in T2WS.  
367 Most missing measurements were due to bad quality exams and concerned the rostrum. Although US is, in  
368 terms of heights measurements, the actual method of choice, it is user- and experience-dependent and highly  
369 reliant on the structure of interest. SR overcomes those issues by providing a unique 3D volume. The lower  
370 rate of missing values on SR compared with T2WS may also be explained by a greater confidence attributed to  
371 SR in comparison to T2WS in the identification of the CC, as it was already suggested in our previous study  
372 (22).

#### 373 **4.4 Inter-observer variability**

374 The inter-experts' analysis shows that, apart from **LCC** (for the reasons evoked in chapter 4.1), **Rostrum** is the  
375 only point of discrepancy between expert US and expert SR. This outcome is consistent with a previous  
376 observation from Garel *et al* (39), where the rostrum is considered as being very difficult to uncover, partially  
377 because of a thinner interhemispheric fissure and the absence of surrounding cerebro-spinal fluid and mainly  
378 because it is the thinnest part of the CC, measuring between 1 and 2 mm (41), while the resolution of SR is  
379 approximately 1 mm<sup>3</sup>. This similarity between rostrum size and effective SR spatial resolution unveils the  
380 problem of the partial volume effect (12), which arises when more than one tissue type is present within a  
381 voxel, thus the different proportion of each tissue within that voxel contribute to the voxel intensity.  
382 Nevertheless, variability within SR measurements between observers reveals that both genu and rostrum  
383 heights are source of disagreement.

384 Overall, this study shows evidence that, although it is not made routinely, measuring the length, the middle  
385 and posterior CC sub-segments' heights by the mean of SR MRI can have an interest in the clinical setting. Even  
386 if it needs further validation, it seems possible that in specific situations, such as when for some reason no  
387 good US is available, but a good MRI is, we could use it to measure the heights that are relevant for a handful  
388 of conditions such as such as CC hypo/hyperplasias or dysgenesis (38).

#### 389 **4.5 The role of the CC area**

390 Few studies focused so far on the CC area and the reported surface of the CC and its sub-segments (33,35,42).  
391 Our CC area through gestation replicate only in part (for younger fetuses) previous reported results from  
392 Araujo *et al* (33). Interestingly, regression line of CC area from SR parallels the US curve, but overestimates the  
393 area, while the T2WS curve shows a parabolic trend. Smaller CC areas in abnormal development have been  
394 reported (43,44), paving the way of this biomarker for neurological outcome. With this diagnostical potential,  
395 reliable measurements of the area of the CC, such as provided by SR will become more and more important in  
396 the future. This will be especially relevant in the context of CC dysplasia, such as the thick/thin corpus callosum,  
397 that remain a difficult CC abnormality to diagnose with conventional methods.

#### 398 **4.6 Feasibility on patients with partial CC agenesis**

399 We aimed also at exploring the feasibility of measurement on patients with partial CC agenesis (11 out of 57  
400 fetuses in our cohort). Because of its bidirectional embryogenesis (45), when a default occurs during its period  
401 of formation and cause a pCCA, the most frequently missing sub-segments will be the most anterior and/or  
402 most posterior, respectively the rostrum or the splenium, which is well reflected in our pathological cohort.  
403 When measuring the CC sub-segments in a case of suspected pCCA, it is important to precisely respect the  
404 anatomical frontiers between the sub-segments, to identify whether a specific part of the CC is missing, as a  
405 whole or as a part. If they are integrated in our study, they though represent a small simple size that jeopardizes  
406 any sub-analysis specifically targeted on them. However, measurements on pCCA are still plotted on the  
407 regressions, and as expected they appear as clear outliers for *LCC* and with smaller measurements in the sub-  
408 segments (0 in case of absence). Future works need to target this population more specifically. Connecting  
409 prenatal biometry with post-natal clinical information in term of neurological development could definitely  
410 help clinician to perform a better pre-natal and post-natal counseling and management (20).

#### 411 **4.7 Limitations**

412 Our study suffers from a relatively small cohort of subjects, nevertheless our results are in line with large scale  
413 US ((31) with sample size of 466) and MRI T2WS ( (32) with sample size of 589 fetuses) studies. Additional  
414 limitations are the retrospective nature of our work and the lack of clinical and genetic follow-up (including  
415 neurological development in the early years of life and post-natal MRI). These limitations are shared by many  
416 studies on fetal brain biometry on US (35) as well as on MRI (36). However, following recent guidelines  
417 recommended in (35) for increasing methodology quality of fetal brain biometry studies on US, we elaborated  
418 numerical charts for the linear regressions, we were blinded for the gestational age, we report the inter- and  
419 intra-observer agreement and the non-visualization rate of the measurements. Another drawback is the two  
420 weeks' timeframe set between the US et MRI imaging. However, it is highly accepted in the literature  
421 (MERIDIAN cohort (25)) and in our study the time difference between US and MR imaging acquisitions remains  
422 modest, with an average time difference between acquisitions of only of 3.9 days (range of 0 to 12 days).  
423 Moreover, the ratio of missing values in US images must be interpreted with caution as patients with a  
424 screening brain ultrasound that was not pathological do not necessarily have targeted CC images. Finally,  
425 gender effect was not evaluated but sexual dimorphism on fetal CC is still unclear, with studies that did (24)  
426 and did not show impact of gender (46).

#### 427 **4.8 Future directions of the research**

428 Our work focuses on the assessment of SR MR imaging for CC measurements. Further work is still needed  
429 towards full automatization of existing SR pipelines and on reducing its computing time as to allow its  
430 integration into the clinical environment. The promise of a massive contribution of SR to diagnostic and therapy  
431 (and to the comprehension of the human neurological development) is though motivating (47).

432 We identified current spatial resolution and partial volume effect in MRI still limiting anterior CC  
433 measurements. A solution could be to thicken millimetric SR images, which may improve CC visibility in  
434 comparison with 1 mm<sup>3</sup> SR, as it is routinely done daily on CT and MRI millimetric images, to search for brain  
435 metastasis for example, or on 3D fetal brain sonography for small areas, by manipulating the volume imaging  
436 contrast. This thicken strategy significantly increases the signal to noise ratio and image quality (48).

437 Alternatively, SR reconstruction at finer spatial resolution scales could also be explored as to reduce the partial  
438 volume effects. Further, variability of measurements on different SR reconstruction pipelines could also be  
439 explored.

440 Today, the International Society of Ultrasound in Obstetrics and Gynecology (ISUOG) encourages 3T fetal MRI  
441 acquisitions which could provide higher resolution and signal to noise ratio (49). In our institution though, only  
442 around 30% of fetal examinations are done at 3T. Nevertheless, future research should evaluate the value of  
443 SR on CC assessment on 3T images and extend it to larger multi-centric cohort on normal and pCCA cases.

444 The addition of other imaging modalities and biomarkers would certainly support CC assessment. For instance  
445 diffusion MRI (50), MR spectroscopy (43) together with gyrification, neuropathological data (38), and long-  
446 term neurodevelopmental follow-up, might improve our understanding of the theories of formation of the CC  
447 and its neurological prognosis. This would allow a better classification of corpus callosum anomalies with an  
448 impact on prenatal counseling and management of patients. Moreover, the visualization of the other forebrain  
449 commissures may help refine the diagnosis better and define the commissural defects of the CC, such as the  
450 pCCA, distinguishing its various forms and of the other forebrain commissures (anterior commissure,  
451 hippocampal commissure).

## 452 **5 CONCLUSIONS**

453 This work shows that SR does not distort fetal CC biometry, providing with measurements close to US, except  
454 for its anterior part. Unlike US and T2WS, SR almost always allowed biometric measurements. In this context,  
455 we can encourage the performance of not only length, but also middle and posterior heights and surface area  
456 measurements by the mean of SR, at least when US is sub-optimal in the cases where CC anomalies are  
457 suspected. SR could be a turning point, combined with other advanced neuroimaging techniques, for a new  
458 classification of CC disruptions that could, alongside with genetic and tractography advances allow a better  
459 evaluation of the neurological prognosis, counseling, and therapy.

## 460 **DATA AVAILABILITY STATEMENT**

461 The data analyzed in this study is subject to the following licenses/restrictions: the ethical approval for the use  
462 of these data did not include public release. Requests to access these datasets should be directed to Meritxell  
463 Bach Cuadra, [meritxell.bachcuadra@unil.ch](mailto:meritxell.bachcuadra@unil.ch)

## 464 **ETHICS STATEMENT**

465 The studies involving human participants were reviewed and approved by the Commission cantonale (VD)  
466 d'éthique de la recherche sur l'être humain (CER-VD 2021-00124).

## 467 **Conflict of Interest**

468 *The authors declare that the research was conducted in the absence of any commercial or financial*  
470 *relationships that could be construed as a potential conflict of interest.*

## 471 **Author Contributions**

472 SL, IV, MK, MBC: conceptualization and design of the study; IV, LP, VD, MK: acquisition of data; SL, LP, IV, PGdD,  
473 VD, MK, MBC: analysis and interpretation of data; SL, LP, IV, MK: MRI/US measurements; IV, LP, MK, MBC:  
474 supervision; SL, PGdD, MK, MBC: writing—original draft; SL, PGdD, LP, IV, VD, MK, MBC: writing, revision, and  
475 editing of the submitted article.

#### 476 **Funding**

477 This work was supported by the Swiss National Science Foundation (project 205321-182602).

478

#### 479 **Acknowledgments**

480 We acknowledge access to the facilities and expertise of the CIBM Center for Biomedical Imaging, a Swiss  
481 research center of excellence founded and supported by Lausanne University Hospital (CHUV), University of  
482 Lausanne (UNIL), Ecole Polytechnique Fédérale de Lausanne (EPFL), University of Geneva (UNIGE) and Geneva  
483 University Hospitals (HUG).

#### 484 **REFERENCES**

- 485 1. Leombroni M, Khalil A, Liberati M, D’Antonio F. Fetal midline anomalies: Diagnosis and counselling Part  
486 1: Corpus callosum anomalies. *European Journal of Paediatric Neurology*. 2018 Nov;22(6):951-62.
- 487 2. Timor-Tritsch IE, Monteagudo A, Pilu G, editors. *Ultrasonography of the prenatal brain*. 3rd ed. New  
488 York: McGraw-Hill Professional; 2012. 490 p.
- 489 3. Griffiths PD, Brackley K, Bradburn M, Connolly DJA, Gawne-Cain ML, Griffiths DI, et al. Anatomical  
490 subgroup analysis of the MERIDIAN cohort: failed commissuration. *Ultrasound Obstet Gynecol*. 2017  
491 Dec;50(6):753-60.
- 492 4. Raile V, Herz NA, Promnitz G, Schneider J, Tietze A, Kaindl AM. Clinical Outcome of Children With  
493 Corpus Callosum Agenesis. *Pediatric Neurology*. 2020 Nov;112:47-52.
- 494 5. Maurice P, Garel J, Garel C, Dhombres F, Friszer S, Guilbaud L, et al. New insights in cerebral findings  
495 associated with fetal myelomeningocele: a retrospective cohort study in a single tertiary centre. *BJOG:  
496 Int J Obstet Gy*. 2021 Jan;128(2):376-83.
- 497 6. The ENSO Working Group, Sileo FG, Pilu G, Prayer D, Rizzo G, Khalil A, et al. Role of prenatal magnetic  
498 resonance imaging in fetuses with isolated anomalies of corpus callosum: multinational study. *Ultrasound  
499 in Obstet & Gyne*. 2021 Jul;58(1):26-33.
- 500 7. Mahallati H, Sotiriadis A, Celestin C, Millischer AE, Sonigo P, Grevent D, et al. Heterogeneity in defining  
501 fetal corpus callosal pathology: systematic review. *Ultrasound in Obstet & Gyne*. 2021 Jul;58(1):11-8.
- 502 8. Malinge G, Paladini D, Haratz KK, Monteagudo A, Pilu GL, Timor-Tritsch IE. ISUOG Practice Guidelines  
503 (updated): sonographic examination of the fetal central nervous system. Part 1: performance of  
504 screening examination and indications for targeted neurosonography. *Ultrasound Obstet Gynecol*. 2020  
505 Sep;56(3):476-84.
- 506 9. Paladini D, Malinge G, Pilu G, Timor-Trisch I, Volpe P. The MERIDIAN trial: caution is needed. *The  
507 Lancet*. 2017 May;389(10084):2103.

- 508 10. Bernardes da Cunha S, Carneiro MC, Miguel Sa M, Rodrigues A, Pina C. Neurodevelopmental  
509 Outcomes following Prenatal Diagnosis of Isolated Corpus Callosum Agenesis: A Systematic Review. *Fetal*  
510 *Diagn Ther.* 2021;48(2):88-95.
- 511 11. Pashaj S, Merz E. Detection of Fetal Corpus Callosum Abnormalities by Means of 3D Ultrasound.  
512 *Ultraschall in Med.* 2015 Nov 3;37(02):185-94.
- 513 12. Gholipour A, Rollins CK, Velasco-Annis C, Ouaalam A, Akhondi-Asl A, Afacan O, et al. A normative  
514 spatiotemporal MRI atlas of the fetal brain for automatic segmentation and analysis of early brain  
515 growth. *Sci Rep.* 2017 Mar 28;7(1):476.
- 516 13. Uus AU, Egloff Collado A, Roberts TA, Hajnal JV, Rutherford MA, Deprez M. Retrospective motion  
517 correction in foetal MRI for clinical applications: existing methods, applications and integration into  
518 clinical practice. *BJR.* 2022 Aug 8;20220071.
- 519 14. Gholipour A, Estroff JA, Warfield SK. Robust Super-Resolution Volume Reconstruction From Slice  
520 Acquisitions: Application to Fetal Brain MRI. *Medical Imaging, IEEE Transactions on.* 2010;29(10):1739-58.
- 521 15. Rousseau F, Glenn OA, Iordanova B, Rodriguez-Carranza C, Vigneron DB, Barkovich JA, et al.  
522 Registration-Based Approach for Reconstruction of High-Resolution In Utero Fetal MR Brain Images.  
523 *Academic Radiology.* 2006;13(9):1072-81.
- 524 16. Kuklisova-Murgasova M, Quaghebeur G, Rutherford MA, Hajnal JV, Schnabel JA. Reconstruction of  
525 fetal brain MRI with intensity matching and complete outlier removal. *Medical Image Analysis.*  
526 2012;16(8):1550-64.
- 527 17. Tourbier S, Bresson X, Hagmann P, Thiran JP, Meuli R, Cuadra MB. An efficient total variation  
528 algorithm for super-resolution in fetal brain MRI with adaptive regularization. *NeuroImage.* 2015  
529 Sep;118:584-97.
- 530 18. Kainz B, Steinberger M, Wein W, Kuklisova-Murgasova M, Malamateniou C, Keraudren K, et al. Fast  
531 volume reconstruction from motion corrupted stacks of 2D slices. *Medical Imaging, IEEE Transactions on.*  
532 2015 Sep;34(9):1901-13.
- 533 19. Ebner M, Wang G, Li W, Aertsen M, Patel PA, Aghwane R, et al. An automated framework for  
534 localization, segmentation and super-resolution reconstruction of fetal brain MRI. *NeuroImage.* 2020  
535 Feb;206:116324.
- 536 20. Pier DB, Gholipour A, Afacan O, Velasco-Annis C, Clancy S, Kapur K, et al. 3D Super-Resolution  
537 Motion-Corrected MRI: Validation of Fetal Posterior Fossa Measurements: Super-Resolution Motion-  
538 Corrected MRI of the Fetal Posterior Fossa. *Journal of Neuroimaging.* 2016 Sep;26(5):539-44.
- 539 21. Kyriakopoulou V, Vatansever D, Davidson A, Patkee P, Elkommos S, Chew A, et al. Normative  
540 biometry of the fetal brain using magnetic resonance imaging. *Brain Structure and Function.* 2017  
541 Jul;222(5):2295-307.
- 542 22. Khawam M, De Dumast P, Deman P, Kebiri H, Yu T, Tourbier S, et al. Fetal brain biometric  
543 measurements on 3D super-resolution reconstructed T2-weighted MRI: An intra-and inter-observer  
544 agreement study. *Frontiers in pediatrics.* 2021;9:639746.

- 545 23. Velasco-Annis C, Gholipour A, Afacan O, Prabhu SP, Estroff JA, Warfield SK. Normative biometrics  
546 for fetal ocular growth using volumetric MRI reconstruction: Normative biometrics for fetal ocular  
547 growth. *Prenatal Diagnosis*. 2015 Apr;35(4):400-8.
- 548 24. Machado-Rivas F, Gandhi J, Choi JJ, Velasco-Annis C, Afacan O, Warfield SK, et al. Normal Growth,  
549 Sexual Dimorphism, and Lateral Asymmetries at Fetal Brain MRI. *Radiology*. 2022 Apr;303(1):162-70.
- 550 25. Griffiths PD, Bradburn M, Campbell MJ, Cooper CL, Graham R, Jarvis D, et al. Use of MRI in the  
551 diagnosis of fetal brain abnormalities in utero (MERIDIAN): a multicentre, prospective cohort study. *The*  
552 *Lancet*. 2017 Feb;389(10068):538-46.
- 553 26. Garcia-Flores J, Recio M, Uriel M, Cañamares M, Cruceyra M, Tamarit I, et al. Fetal magnetic  
554 resonance imaging and neurosonography in congenital neurological anomalies: supplementary diagnostic  
555 and postnatal prognostic value. *The Journal of Maternal-Fetal & Neonatal Medicine*. 2013  
556 Oct;26(15):1517-23.
- 557 27. The ENSO Working Group, Di Mascio D, Khalil A, Thilaganathan B, Rizzo G, Buca D, et al. Role of  
558 prenatal magnetic resonance imaging in fetuses with isolated mild or moderate ventriculomegaly in the  
559 era of neurosonography: international multicenter study. *Ultrasound Obstet Gynecol*. 2020  
560 Sep;56(3):340-7.
- 561 28. 1. Basics of 3D and 4D Volume Acquisition. In: *3D Ultrasound in Prenatal Diagnosis* [Internet]. De  
562 Gruyter; 2016 [cited 2023 Mar 17]. p. 3-14. Available from:  
563 <https://www.degruyter.com/document/doi/10.1515/9783110497359-002/html>
- 564 29. Pomar L, Baert J, Mchirgui A, Lambert V, Carles G, Hcini N, et al. Comparison between Two-  
565 Dimensional and Three-Dimensional Assessments of the Fetal Corpus Callosum: Reproducibility of  
566 Measurements and Acquisition Time. *Journal of Pediatric Neurology*. 2021 Oct;19(05):312-20.
- 567 30. Yushkevich PA, Piven J, Hazlett HC, Smith RG, Ho S, Gee JC, et al. User-guided 3D active contour  
568 segmentation of anatomical structures: Significantly improved efficiency and reliability. *NeuroImage*.  
569 2006 Jul;31(3):1116-28.
- 570 31. Pashaj S, Merz E, Wellek S. Biometry of the fetal corpus callosum by three-dimensional ultrasound:  
571 Biometry of the fetal corpus callosum. *Ultrasound Obstet Gynecol*. 2013 Dec;42(6):691-8.
- 572 32. Tilea B, Alberti C, Adamsbaum C, Armoogum P, Oury JF, Cabrol D, et al. Cerebral biometry in fetal  
573 magnetic resonance imaging: new reference data. *Ultrasound in Obstetrics and Gynecology*. 2009  
574 Feb;33(2):173-81.
- 575 33. Júnior EA, Visentainer M, Simioni C, Ruano R, Nardoza LMM, Moron AF. Reference Values for the  
576 Length and Area of the Fetal Corpus Callosum on 3-Dimensional Sonography Using the Transfrontal View.  
577 *Journal of Ultrasound in Medicine*. 2012 Feb;31(2):205-12.
- 578 34. Achiron R, Achiron A. Development of the human fetal corpus callosum: a high-resolution, cross-  
579 sectional sonographic study: Fetal corpus callosum development. *Ultrasound Obstet Gynecol*. 2001  
580 Oct;18(4):343-7.



- 581 35. Rosenbloom JI, Yaeger LH, Porat S. Reference Ranges for Corpus Callosum and Cavum Septi  
582 Pellucidi Biometry on Prenatal Ultrasound: Systematic Review and Meta-Analysis. *J of Ultrasound*  
583 *Medicine*. 2022 Sep;41(9):2135-48.
- 584 36. Di Mascio D, Khalil A, Rizzo G, Kasprian G, Caulo M, Manganaro L, et al. Reference ranges for fetal  
585 brain structures using magnetic resonance imaging: systematic review. *Ultrasound in Obstet & Gyne.*  
586 2022 Mar;59(3):296-303.
- 587 37. Harreld JH, Bhore R, Chason DP, Twickler DM. Corpus Callosum Length by Gestational Age as  
588 Evaluated by Fetal MR Imaging. *AJNR Am J Neuroradiol*. 2011 Mar;32(3):490-4.
- 589 38. Izzo G, Toto V, Doneda C, Parazzini C, Lanna M, Bulfamante G, et al. Fetal thick corpus callosum:  
590 new insights from neuroimaging and neuropathology in two cases and literature review. *Neuroradiology.*  
591 2021 Dec;63(12):2139-48.
- 592 39. Garel C, Cassart M. *Imagerie du fœtus au nouveau-né*. 2016.
- 593 40. Prayer D, Malinge G, Brugger PC, Cassady C, De Catte L, De Keersmaecker B, et al. ISUOG Practice  
594 Guidelines: performance of fetal magnetic resonance imaging. *Ultrasound in Obstet & Gyne*. 2017  
595 May;49(5):671-80.
- 596 41. Raybaud C. The corpus callosum, the other great forebrain commissures, and the septum  
597 pellucidum: anatomy, development, and malformation. *Neuroradiology*. 2010 Jun;52(6):447-77.
- 598 42. Shi Y, Xue Y, Chen C, Lin K, Zhou Z. Association of gestational age with MRI-based biometrics of  
599 brain development in fetuses. *BMC Med Imaging*. 2020 Dec;20(1):125.
- 600 43. Sanz-Cortes M, Egaña-Ugrinovic G, Simoes RV, Vazquez L, Bargallo N, Gratacos E. Association of  
601 brain metabolism with sulcation and corpus callosum development assessed by MRI in late-onset small  
602 fetuses. *American Journal of Obstetrics and Gynecology*. 2015 Jun;212(6):804.e1-804.e8.
- 603 44. Egaña-Ugrinovic G, Sanz-Cortés M, Couve-Pérez C, Figueras F, Gratacós E. Corpus callosum  
604 differences assessed by fetal MRI in late-onset intrauterine growth restriction and its association with  
605 neurobehavior: Corpus callosum assessment in term IUGR and its correlation with neurobehavior. *Prenat*  
606 *Diagn*. 2014 Sep;34(9):843-9.
- 607 45. Birnbaum R, Barzilay R, Brusilov M, Wolman I, Malinge G. The early pattern of human corpus  
608 callosum development: A transvaginal 3D neurosonographic study. *Prenatal Diagnosis*. 2020  
609 Sep;40(10):1239-45.
- 610 46. Gafner M, Kedar Sade E, Barzilay E, Katorza E. Sexual dimorphism of the fetal brain biometry: an  
611 MRI-based study. *Arch Gynecol Obstet [Internet]*. 2022 Oct 17 [cited 2023 Mar 18]; Available from:  
612 <https://link.springer.com/10.1007/s00404-022-06818-4>
- 613 47. Stout JN, Bedoya MA, Grant PE, Estroff JA. Fetal Neuroimaging Updates. *Magnetic Resonance*  
614 *Imaging Clinics of North America*. 2021 Nov;29(4):557-81.
- 615 48. Paladini D, Malinge G, Birnbaum R, Monteagudo A, Pilu G, Salomon LJ, et al. ISUOG Practice  
616 Guidelines (updated): sonographic examination of the fetal central nervous system. Part 2: performance  
617 of targeted neurosonography. *Ultrasound in Obstet & Gyne*. 2021 Apr;57(4):661-71.

- 618 49. Cassart M, Garel C. European overview of current practice of fetal imaging by pediatric radiologists:  
619 a new task force is launched. *Pediatr Radiol*. 2020 Nov;50(12):1794-8.
- 620 50. Millischer AE, Grevent D, Sonigo P, Bahi-Buisson N, Desguerre I, Mahallati H, et al. Feasibility and  
621 Added Value of Fetal DTI Tractography in the Evaluation of an Isolated Short Corpus Callosum:  
622 Preliminary Results. *AJNR Am J Neuroradiol*. 2022 Jan;43(1):132-8.
- 623
