# Supplementary material for: Assessment of fetal corpus callosum biometry by 3D super-resolution reconstructed T2-weighted MRI
Source: bioRxiv or medRxiv preprint supplement (doi:10.1101/2023.06.08.23291142), 2023-06-12
Supplement: Supplementary file [file media-1.pdf]

**SUPPLEMENTARY MATERIAL: “Assessment of fetal corpus callosum biometry by  
3D super-resolution reconstructed T2-weighted MRI”**

**Samuel Lamon<sup>1,2,3</sup>, Priscille de Dumast<sup>1,2</sup>, Vincent Dunet<sup>1</sup>, Léo Pomar<sup>3,4</sup>, Yvan Vial<sup>3</sup>, Mériam Koob<sup>1,†</sup>, Meritxell Bach Cuadra<sup>2,1,\*,†</sup>**

<sup>1</sup>Department of Radiology, Lausanne University Hospital and University of Lausanne, Lausanne, Switzerland

<sup>2</sup>CIBM Center for Biomedical Imaging, Lausanne, Switzerland

<sup>3</sup>Ultrasound and Fetal Medicine, Department Woman-Mother-Child, Lausanne University Hospital and Lausanne University, Lausanne, Switzerland

<sup>4</sup>School of Health Sciences (HESAV), University of Applied Sciences and Arts Western Switzerland, Lausanne, Switzerland

† Equally contributed

\* **Correspondence:** Meritxell Bach Cuadra  
meritxell.bachcuadra@unil.ch

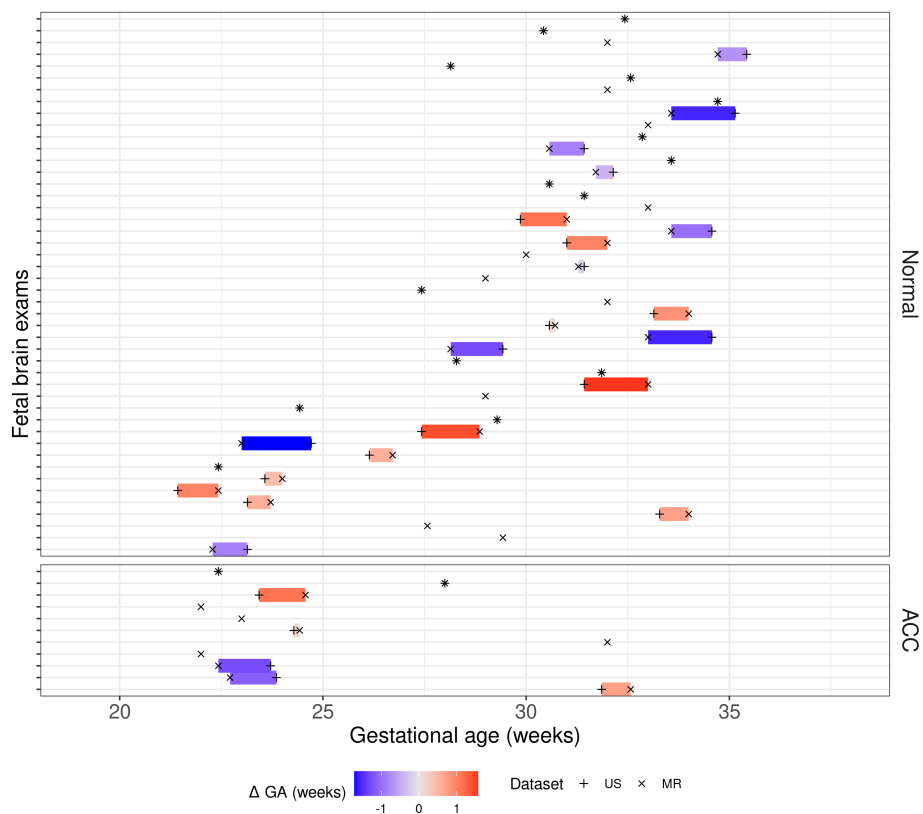

**Figure S1** Gestational age at moment of Ultrasound (+) and MR (x) acquisition. Dark colors (blue or red) illustrate the largest time difference.

**Table S1** Intra class correlation coefficient (ICC) for observer 1. Average on 9 normal and 3 pCCA repeated measurements.

| ICC (Obs1) | US    | T2WS  | SR    |
|------------|-------|-------|-------|
| LCC        | 0.999 | 0.996 | 0.995 |
| Splenium   | 0.979 | 0.993 | 0.979 |
| Body       | 0.832 | 0.707 | 0.145 |
| Genu       | 0.821 | 0.812 | 0.536 |
| Rostrum    | 0.887 | 0.903 | 0.579 |
| Overall    | 1     | 0.99  | 0.99  |

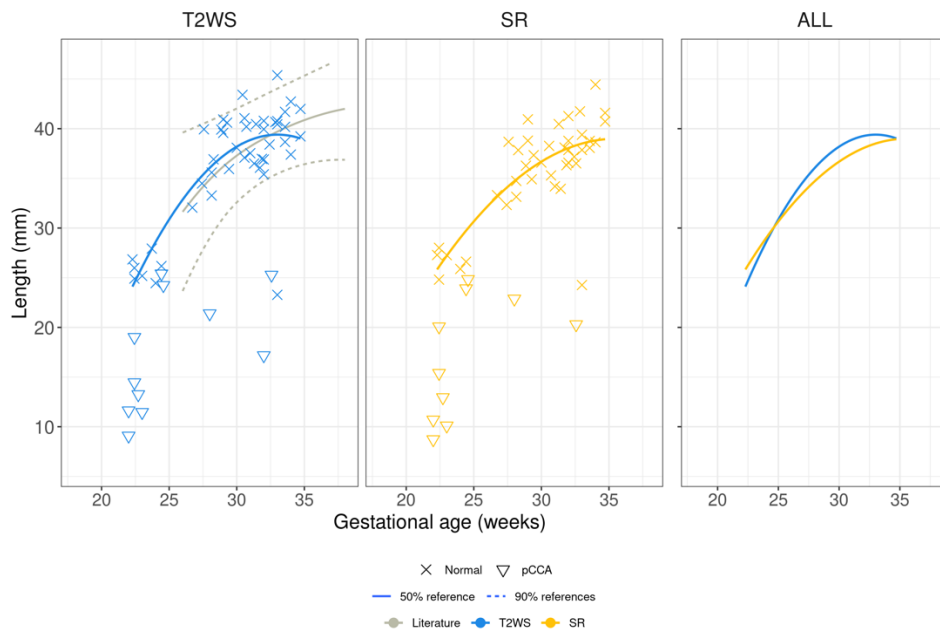

**Figure S2** Regression of LCC measurements of Obs2 (expert MR) with gestational age.

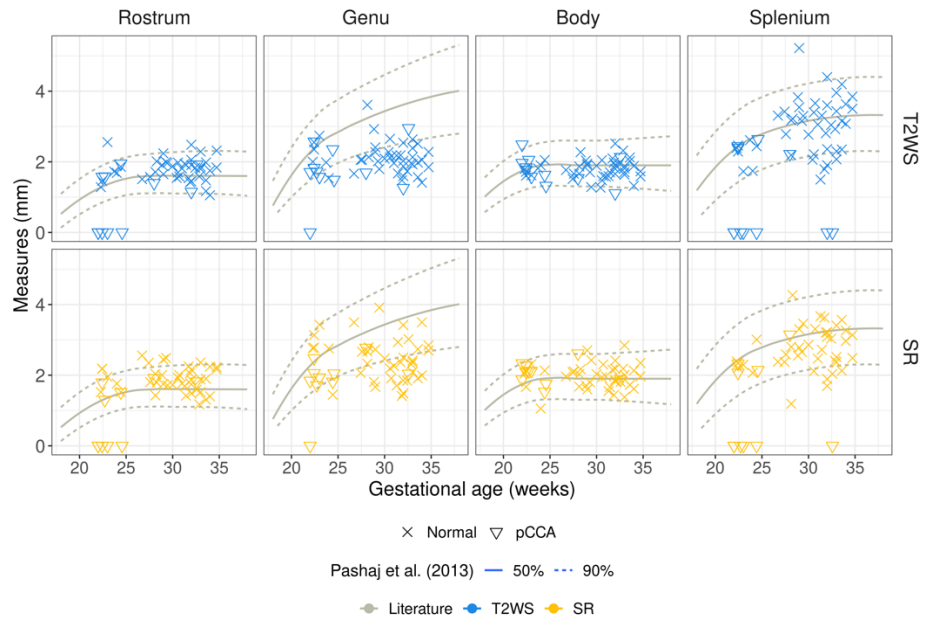

**Figure S3** Regression of CC heights measurements (Rostrum, Genu, Body and Splenium) of Obs2 (expert MR) with gestational age.
